# Supplementary material for: The Short Non-Coding Transcriptome of the Protozoan Parasite Trypanosoma cruzi
Source: PubMed Central journal article supplement (PMC3166047; doi:10.1371/journal.pntd.0001283), 2011-08-30

**tRNA-Arg:anticodon TCG (Tc00.1047053508043.19)**  
Non-Esmeraldo-like chromosome 22 from 345,408 Uo 345,479

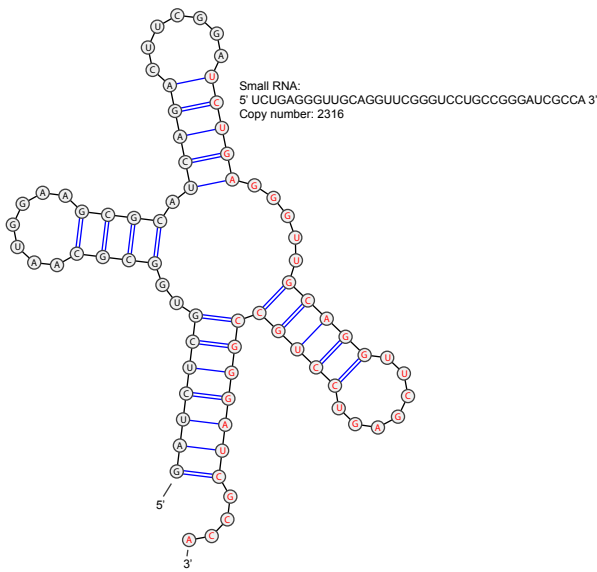

**tRNA-His:anticodon GTG (Tc00.1047053508861.10)**  
Non-Esmeraldo-like chromosome 11 from 253,538 to 253,608U

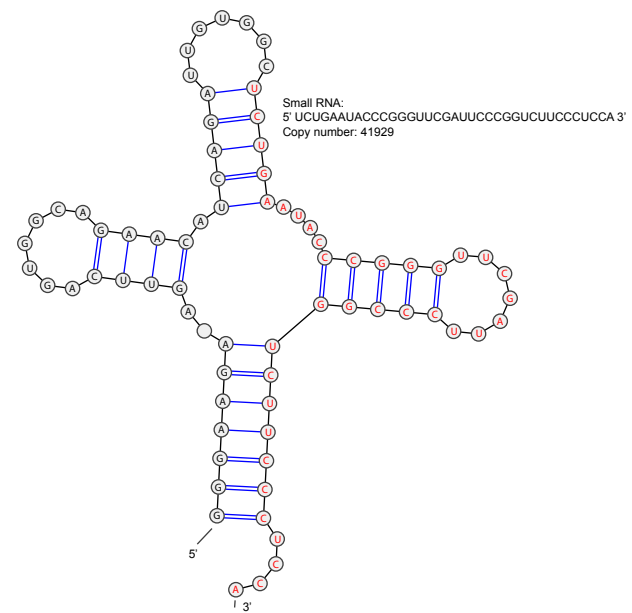

**tRNA-Val:anticodon CAC (Tc00.1047053506459.249)**  
Non-Esmeraldo-like chromosome 41 from 593,449 to 593,521

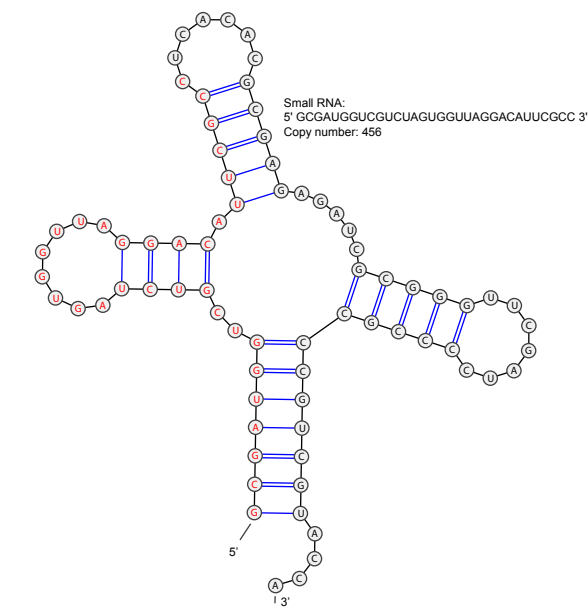

**tRNA-Trp:anticodon CCA (Tc00.1047053506847.17)**  
Esmeraldo-like chromosome 22 from 447,042 to 447,113

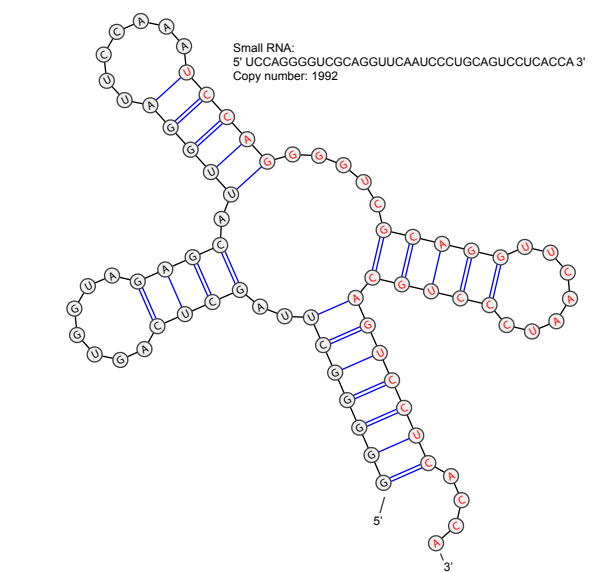

**tRNA-Gln:anticodon TTG (Tc00.1047053504427.232)**  
Esmeraldo-like chromosome 22 from 329,028 to 329,099

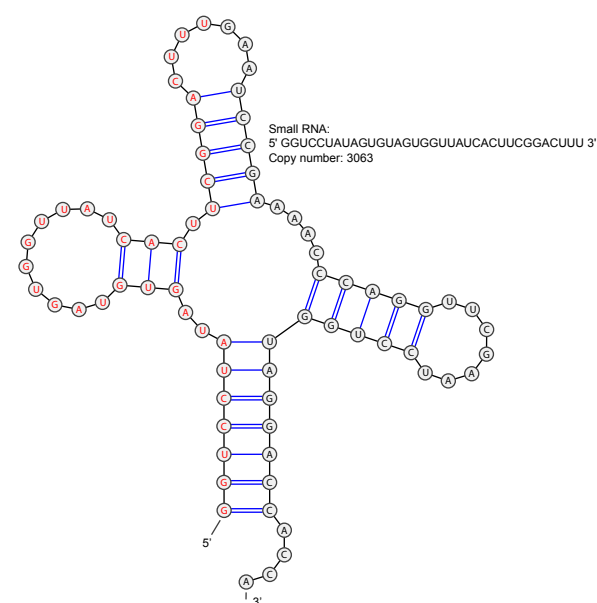

**tRNA-Asp:anticodon GTC (Tc00.1047053510057.60)**  
Esmeraldo-like chromosome 17 from 438,169 to 438,240

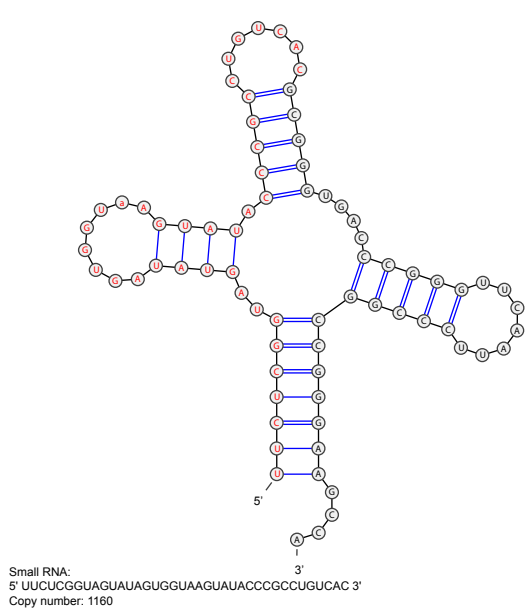

Supplement: pntd.0001283.s002.pdf [file pntd.0001283.s002.pdf]
