# Supplementary material for: The Short Non-Coding Transcriptome of the Protozoan Parasite Trypanosoma cruzi
Source: PubMed Central journal article supplement (PMC3166047; doi:10.1371/journal.pntd.0001283), 2011-08-30

A

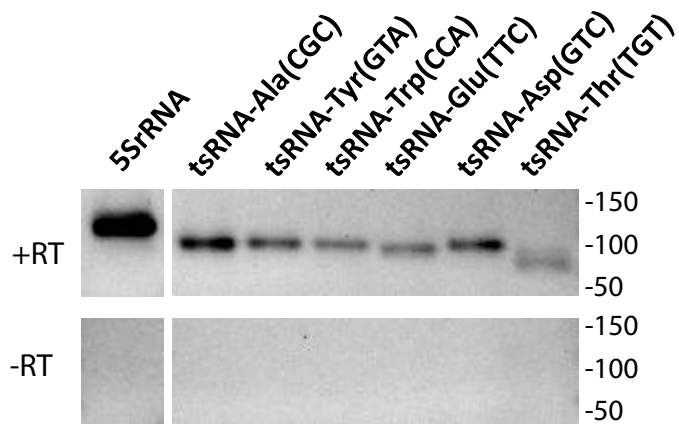

B

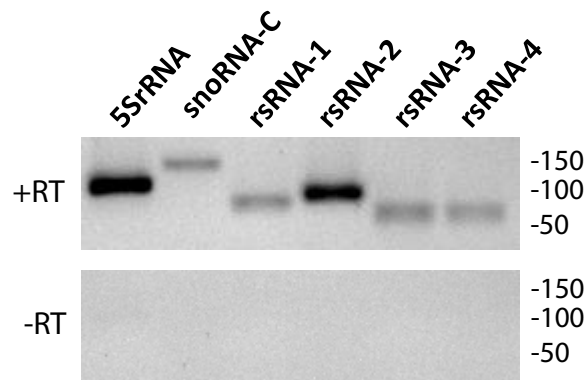

C

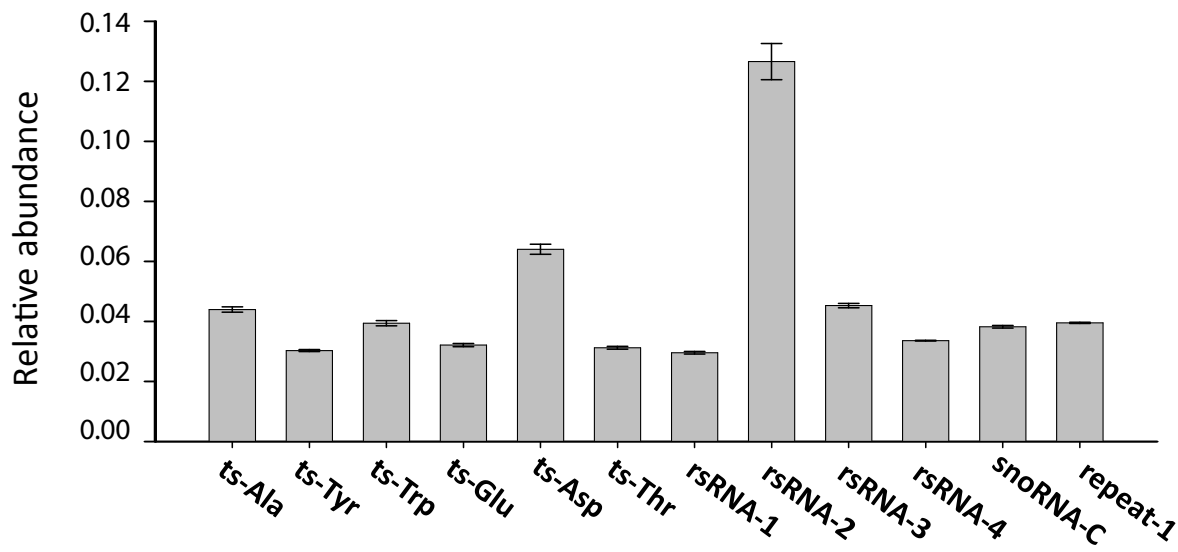

Supplement: pntd.0001283.s003.pdf [file pntd.0001283.s003.pdf]
