# Supplementary material for: The Short Non-Coding Transcriptome of the Protozoan Parasite Trypanosoma cruzi
Source: PLoS Negl Trop Dis. 2011 Aug 30;5(8):e1283. doi: 10.1371/journal.pntd.0001283 (PMC3166047; doi:10.1371/journal.pntd.0001283)
Supplement: Table S2 — i) Summary of repetitive elements identified in the T. cruzi genome sequence. ii) Table with the number of reads that align within each type of element. (XLS) [file pntd.0001283.s005.xls]

## Sheet: Results
Repeat element a	# Reads b	% coverage c
TCRP1	0 [0]	0.02
TCSAT1	150 [126]	5.72
TCKIN2	121 [102]	0
CZAR	446 [84]	0.21
SZ23	7 [6]	0.26
TCRP2	0 [0]	0.02
E22	2 [2]	0.5
C6	0 [0]	0
HAEIII-ECOR1	14 [12]	1.56
L1	15 [12]	1.36
TcVIPER	25 [17]	1.64
SIRE	2 [2]	0.44
TCRP3	0 [0]	0.02
a Repeat elements were identified in the genome using RepeatMasker and RepBase.
b Refers to the number of single and multi mapping reads with either complete or partial overlap. The number in brackets refers to the number of unique (non-redundant) reads.
c Refers to the percentage of the genome covered by this repeat element.
